# Supplementary material for: Status and influential factors of soil nutrients and acidification in Chinese tea plantations
Source: Copernicus journal article supplement (doi:10.5194/egusphere-2024-2498), 2024-08-28
Supplement: Supplementary file 1 [file egusphere-2024-2498-supplement.pdf]

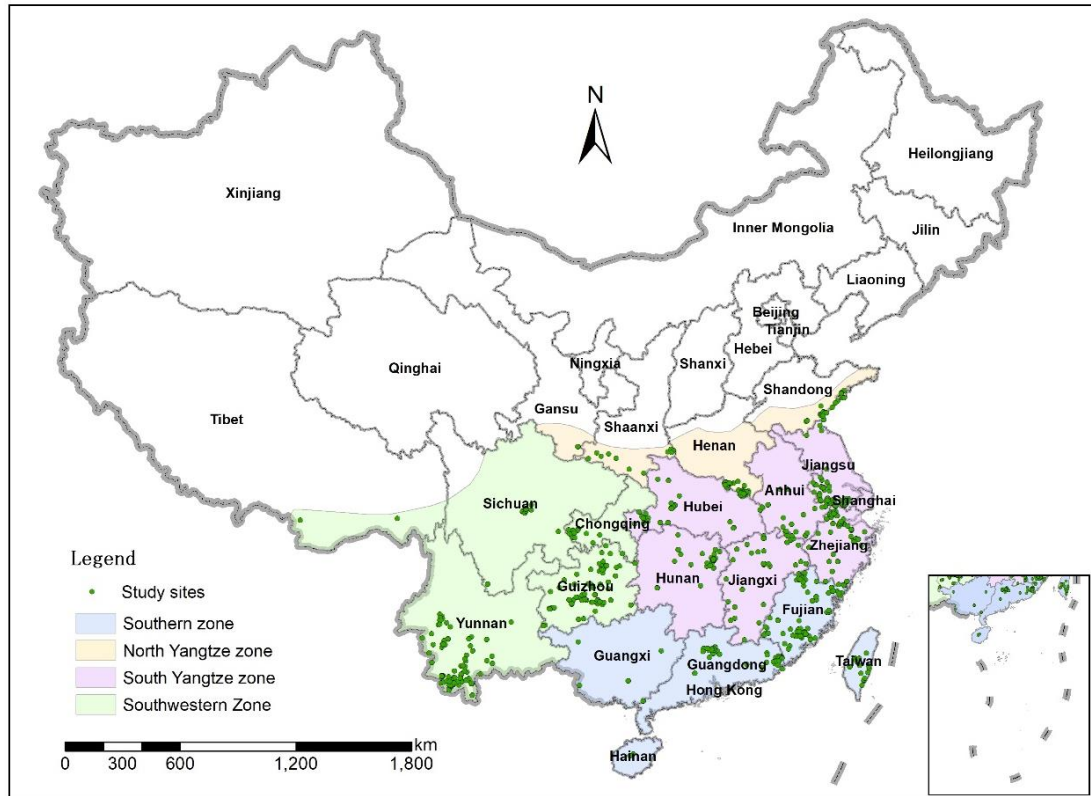

Figure S1. Tea cultivation zones and provinces in China and the spatial distribution of study sites.

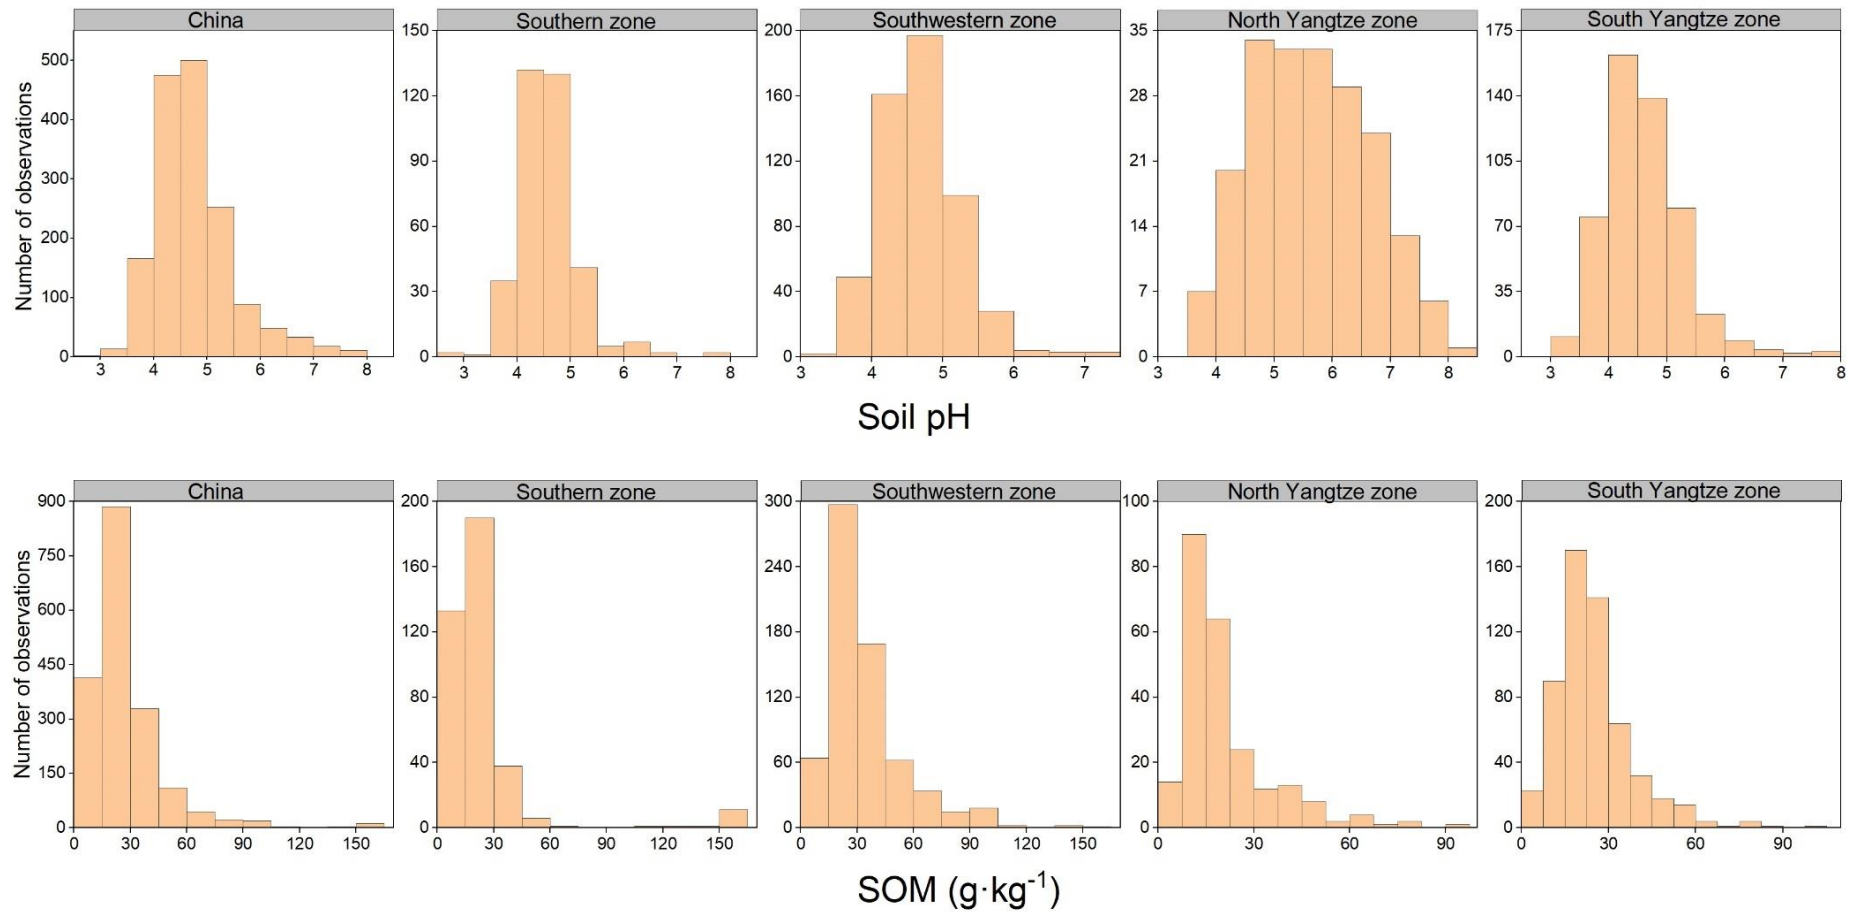

Figure S2. Frequency distribution of soil pH and SOM in tea plantations in China and cultivation zones.

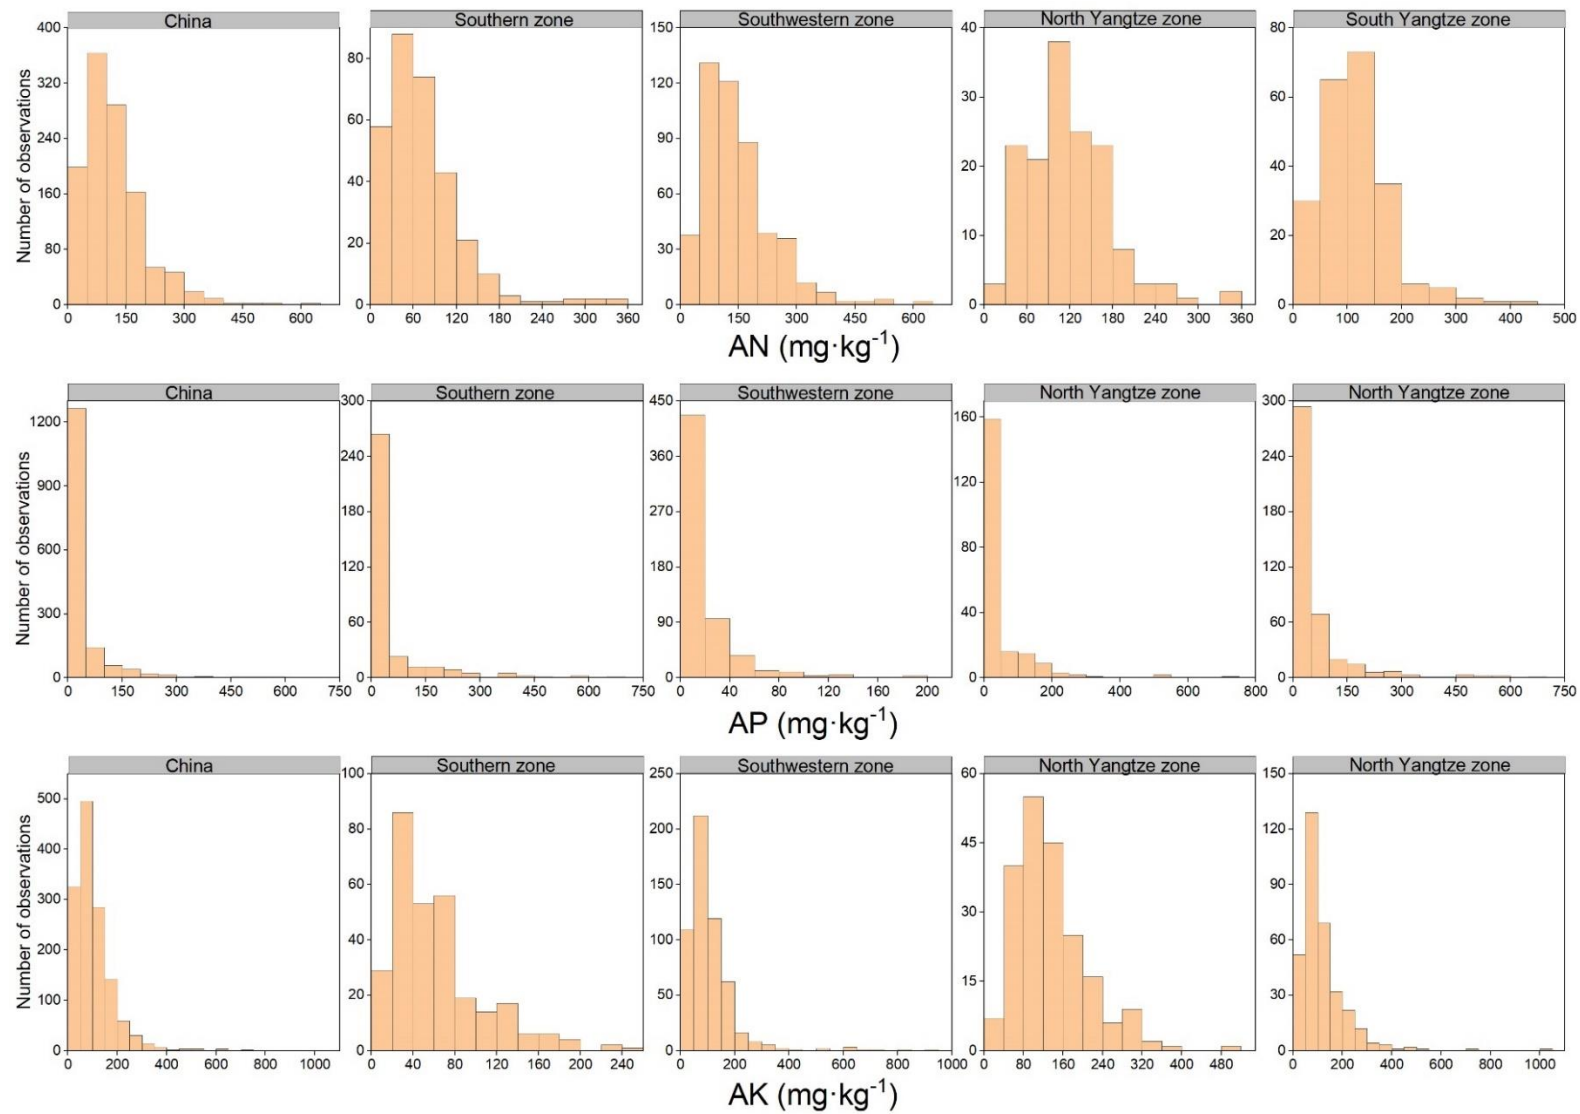

Figure S3. Frequency distribution of soil AN, AP and AK in tea plantations in China and cultivation zones.

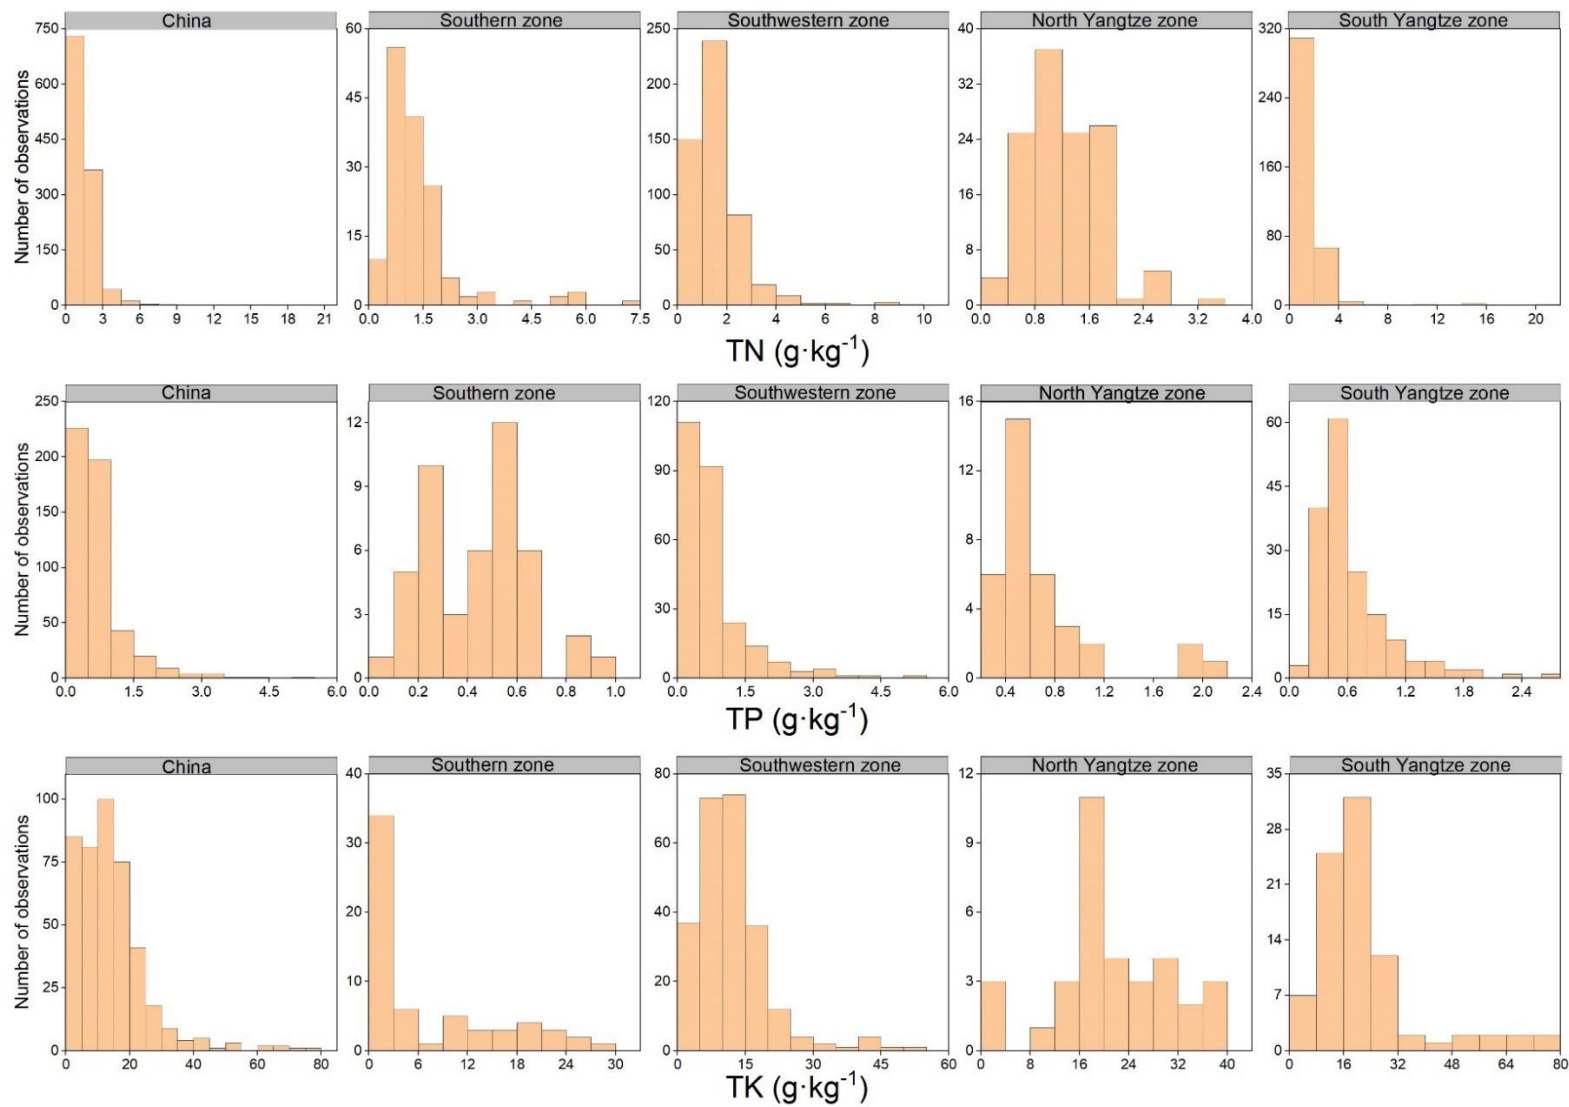

Figure S4. Frequency distribution of soil TN, TP and TK in tea plantations in China and cultivation zones.

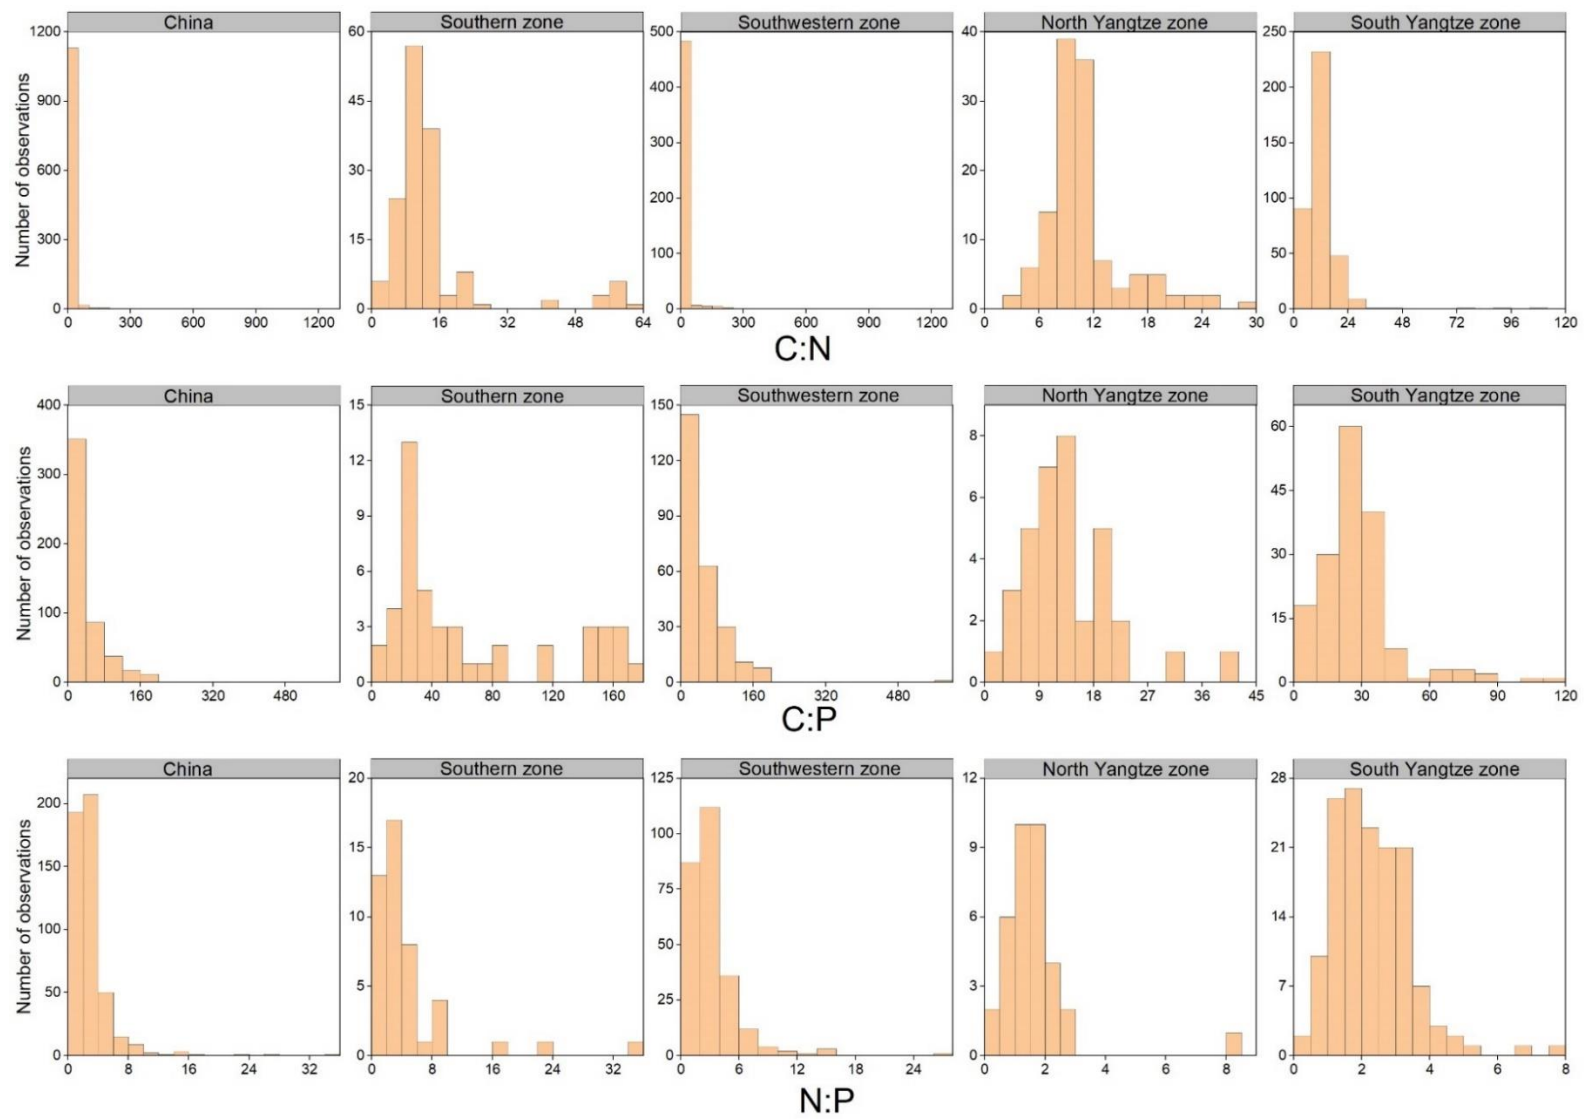

Figure S5. Frequency distribution of stoichiometric ratios of C:N, C:P and N:P in tea plantations in China and cultivation zones.

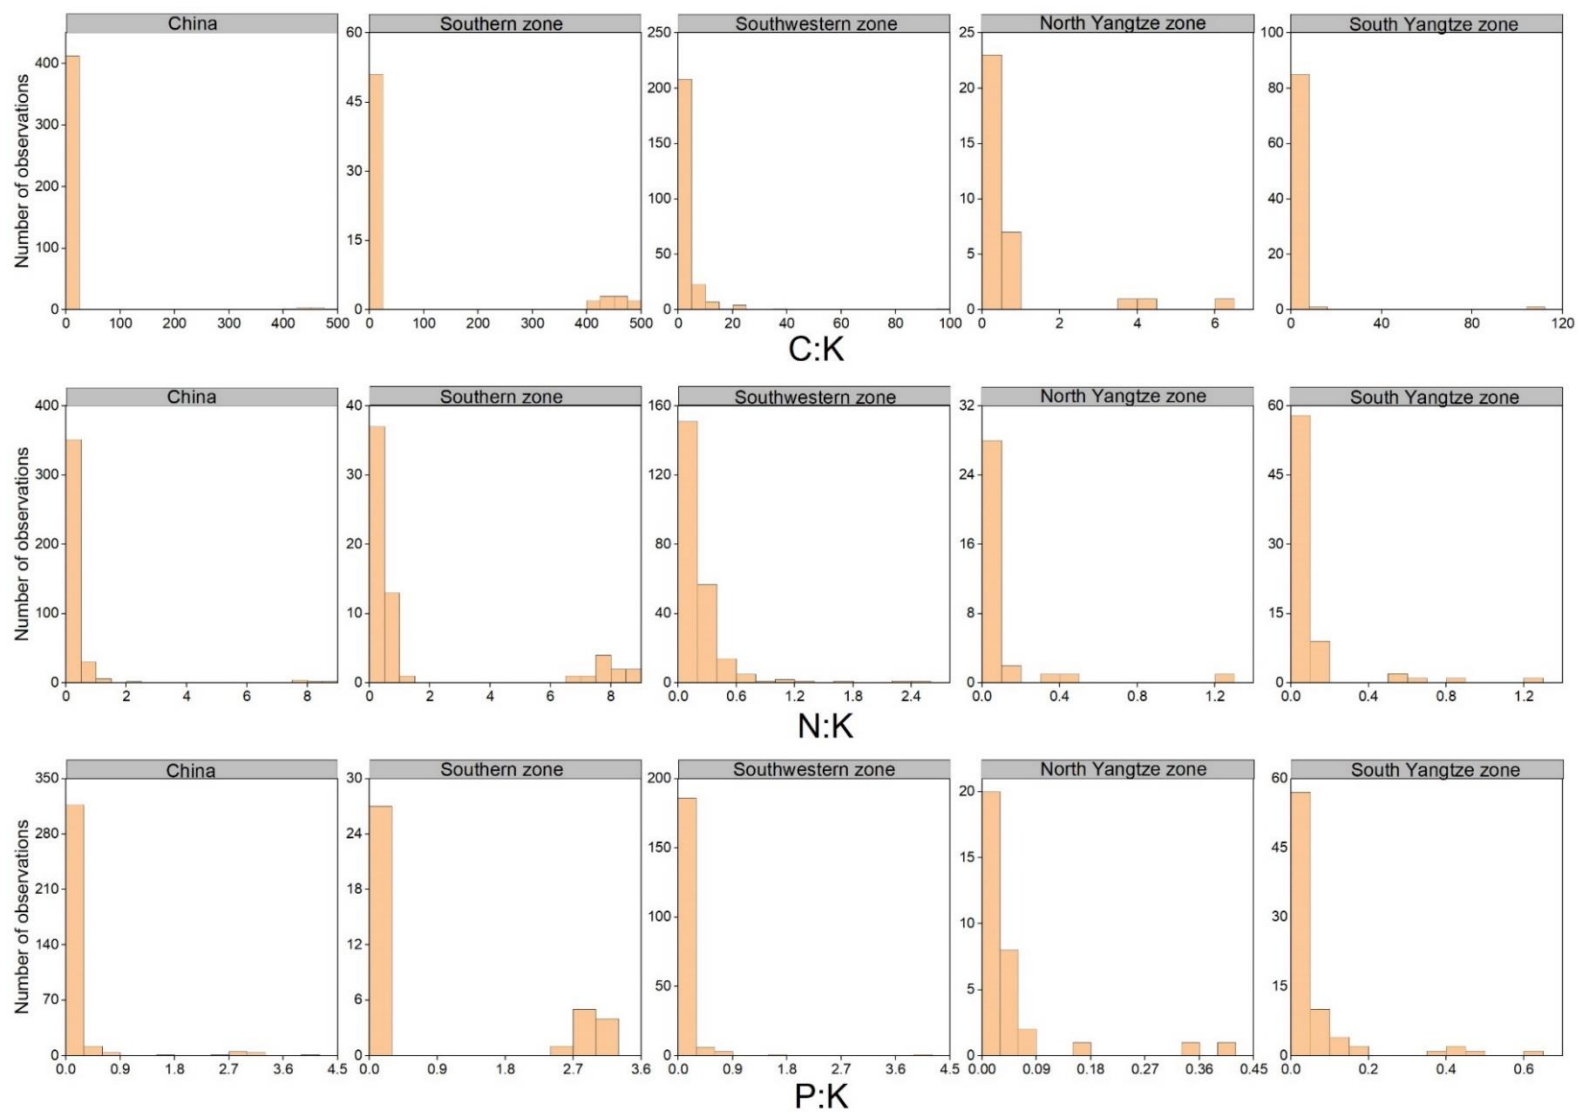

Figure S6. Frequency distribution of stoichiometric ratios of C:K, N:K and P:K in tea plantations in China and cultivation zones.
